# Supplementary material for: Liposome manufacturing under continuous flow conditions: towards a fully integrated set-up with in-line control of critical quality attributes
Source: Royal Society of Chemistry journal article supplement (doi:10.1039/d2lc00463a), 2022-11-21

Electronic Supplementary Material (ESI) for Lab on a Chip.  
This journal is © The Royal Society of Chemistry 2022

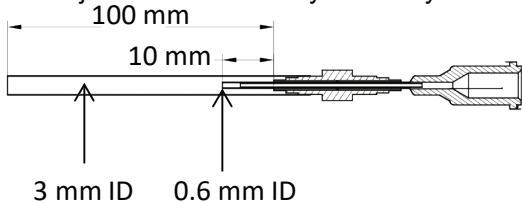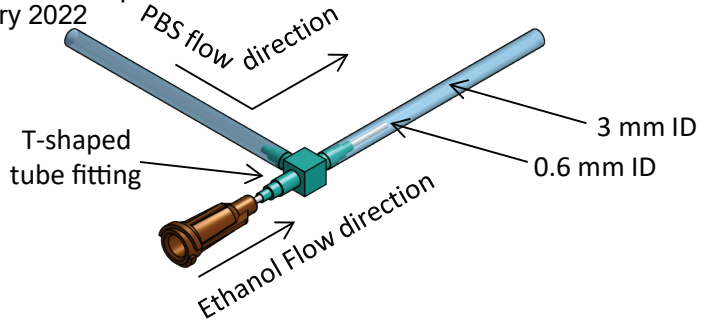

Supplement: d2lc00463a3.pdf [file d2lc00463a3.pdf]
