# Supplementary figures and images for: Liposome manufacturing under continuous flow conditions: towards a fully integrated set-up with in-line control of critical quality attributes
Source: Royal Society of Chemistry journal article supplement (doi:10.1039/d2lc00463a), 2022-11-21

**A**

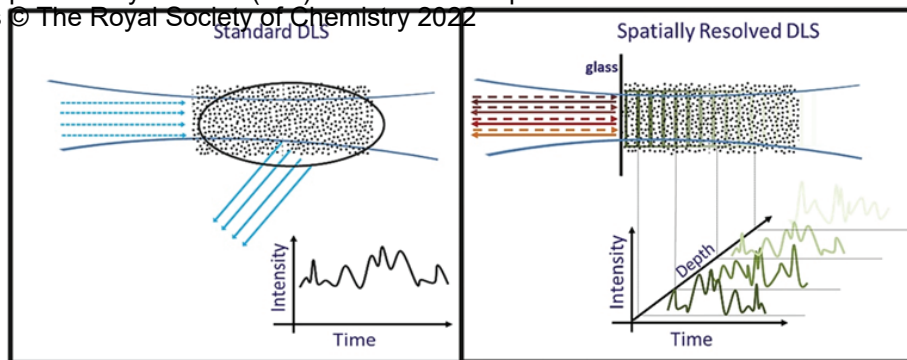

**B**

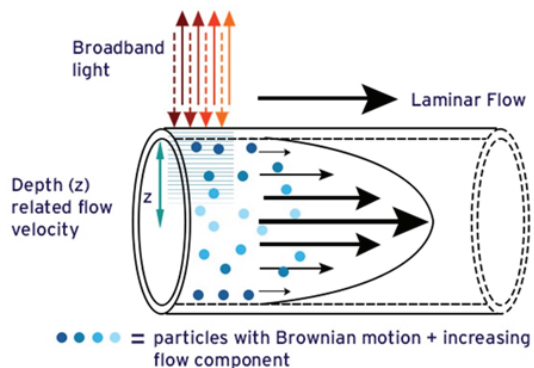

**C**

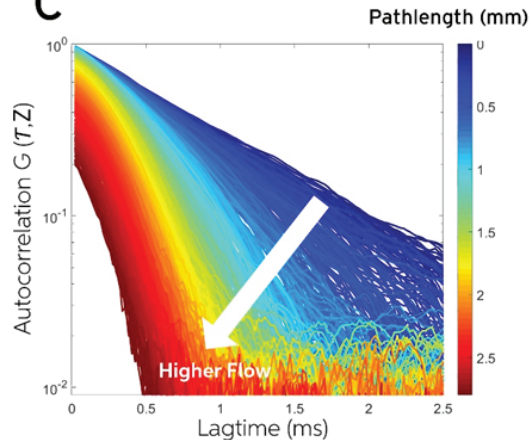

Supplement: d2lc00463a4.pdf [file d2lc00463a4.pdf]

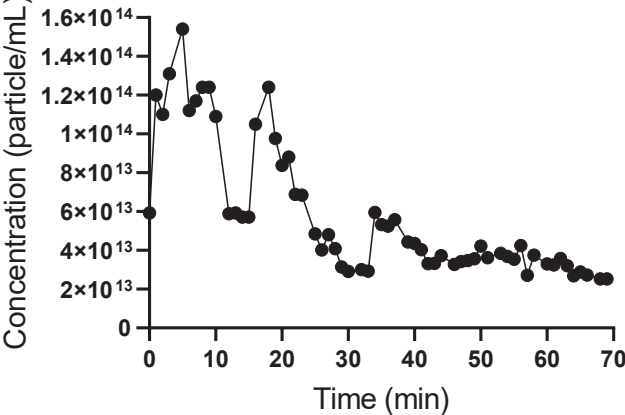

Supplement: d2lc00463a6.pdf [file d2lc00463a6.pdf]
